# Supplementary material
Source: Springer Nature journal article supplement (https://www.springermedizin.de/resource/supplementary/13054_2010_8625_MOESM1_ESM.pdf/9732396)
Supplement: MOESM1 [file 9732396]

**Identification**

Records identified through  
database searching  
(n = 840)

Additional records identified  
through other sources  
(n = 3)

Records after duplicates removed  
(n = 505)

**Screening**

Records screened  
(n = 505)

Records excluded  
(n = 483)

**Eligibility**

Full-text articles assessed  
for eligibility  
(n = 22)

Full-text articles excluded,  
with reasons  
(n = 4)

- Full-text not available  
(n = 2)
- Report on the same  
study (n = 2)

Studies included in  
qualitative synthesis  
(n = 18)
